# Supplementary material for: Perioperative Anaemia is a Risk Factor of Acute Kidney Injury in Patients Undergoing Partial Nephrectomy
Source: Research Square preprint supplement (doi:10.21203/rs.3.rs-94939/v1), 2020-10-22
Supplement: Supplementary file 1 [file 8d850d4dfd4ef92205ddefd2.docx]

**Supplement Table 1** Incidence of postoperative AKI by different criteria

|  | | Patients with perioperative anaemia (n=24) | Patients without perioperative anaemia (n=44) | p value |
| --- | --- | --- | --- | --- |
| KDIGO criteria, | 14 (58.3) | | 8 (18.2) | 0.0011**† |
| Serum NGAL>150ng/mL | 19 (79.2) | | 16 (36.4) | 0.0009***† |
| p value | 0.2124† | | 0.0927† | - |

Values are in mean (SD)

*Abbreviations* *AKI* acute kidney injury, *NGAL* neutrophil gelatinase-associated lipocalin

† Chi-square test.

** meant p < 0.01, * meant p < 0.05, were assumed as statistically significant.
